# Supplementary material for: A series of Mn(i) photo-activated carbon monoxide-releasing molecules with benzimidazole coligands: synthesis, structural characterization, CO releasing properties and biological activity evaluation
Source: Royal Society of Chemistry journal article supplement (doi:10.1039/c9ra01370a), 2019-01-01
Supplement: c9ra01370a1.pdf [file c9ra01370a1.pdf]

## Supplementary Information

### A Series of Mn(I) Photo-activated Carbon Monoxide-Releasing Molecules with Benzimidazole Coligands: Synthesis, Structural Characterization, CO Releasing Properties and Biological Activities

Mixia Hu,<sup>1,2,3</sup> YaLi Yan,<sup>4</sup> Baohua Zhu,<sup>1,2\*</sup> Fei Chang,<sup>1</sup> Shiyong Yu<sup>1</sup> and Gaole Alatan<sup>4</sup>

<sup>1</sup>Chemistry and Chemical Engineering College, Inner Mongolia University, Hohhot 010021, China. <sup>2</sup>Key Lab of Fine Organic Synthesis Inner Mongolia Autonomous Region, Hohhot 010021, China. <sup>3</sup>College of Pharmacy, Inner Mongolia Medical University, Hohhot 010110, China. <sup>4</sup>School of Life Sciences, Inner Mongolia University, Hohhot 010021, China

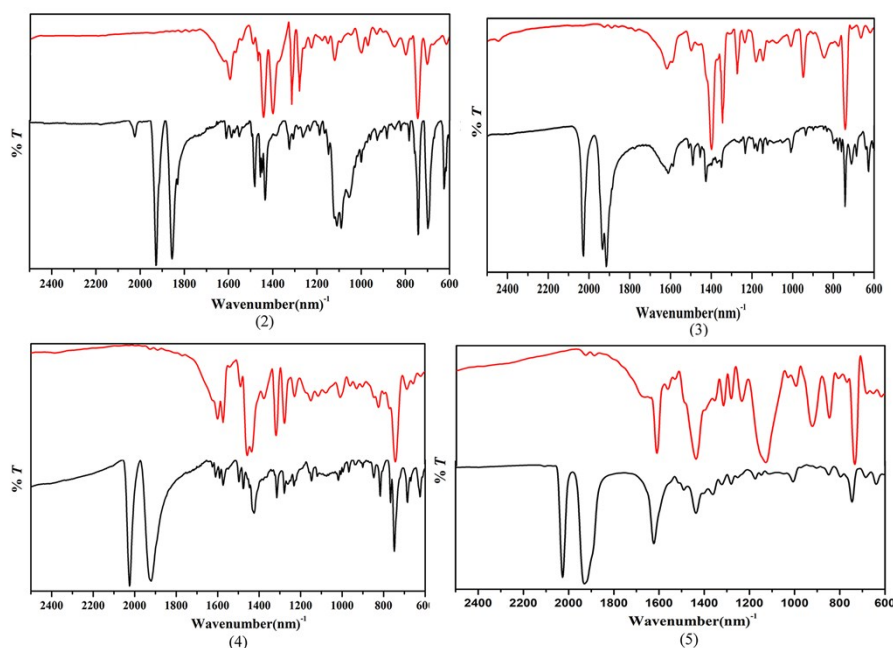

**Fig. S1** IR spectrum of 1-5 (KBr disk) (black) and its photoproduct (red).

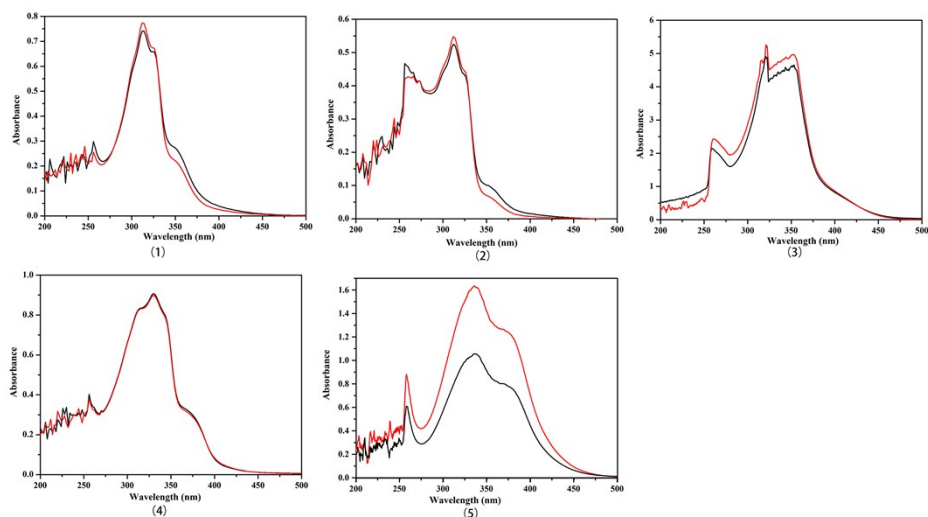

**Fig. S2** The UV-vis absorption spectra of **1-5** in DMSO solution at room temperature (black) and The UV-vis absorption spectra of **1-5** in DMSO solution away from light for 24h (Red).

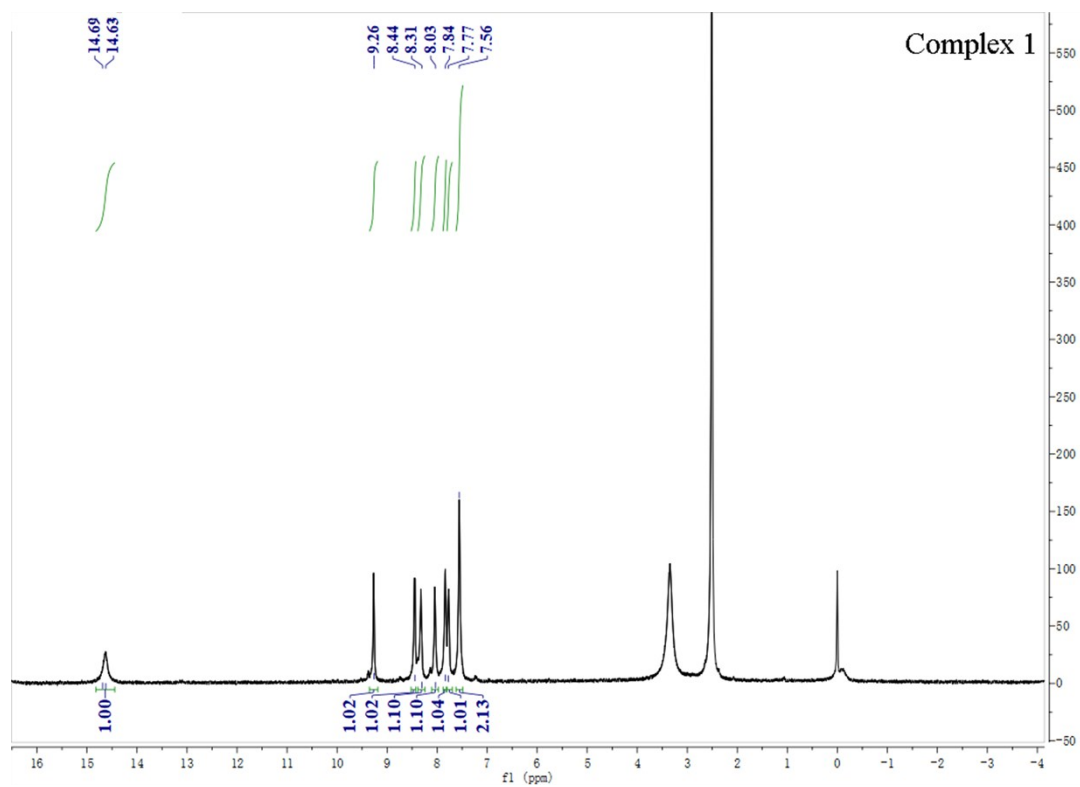

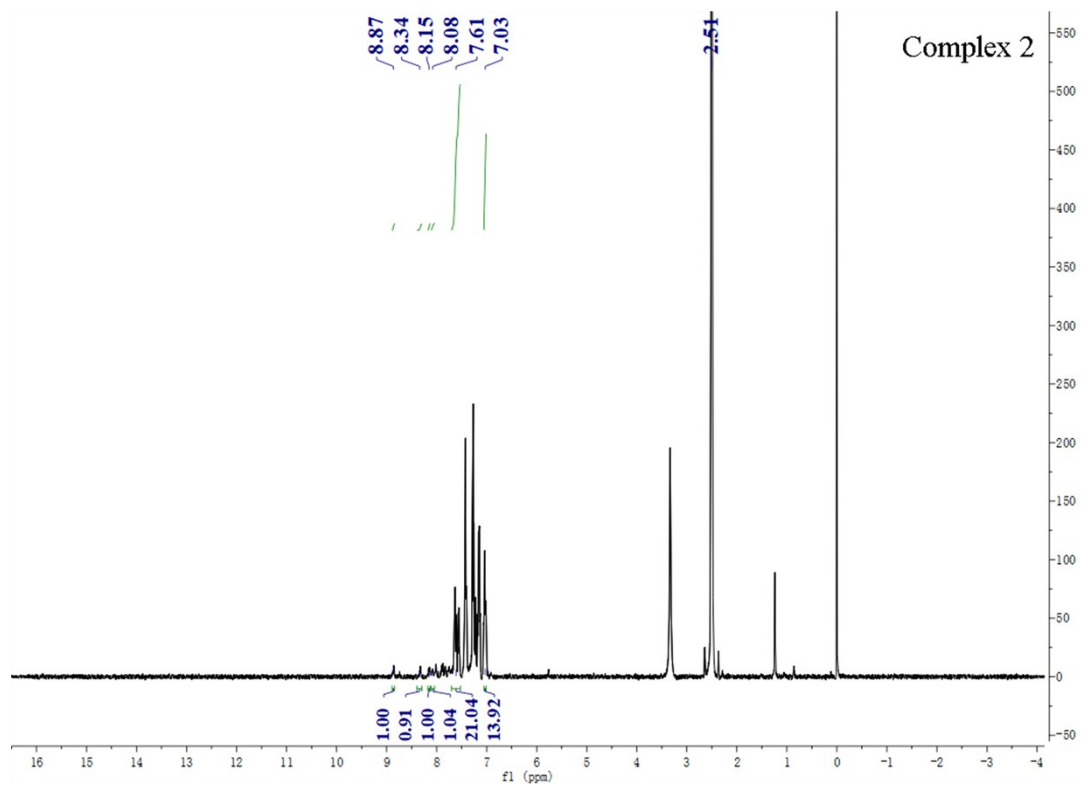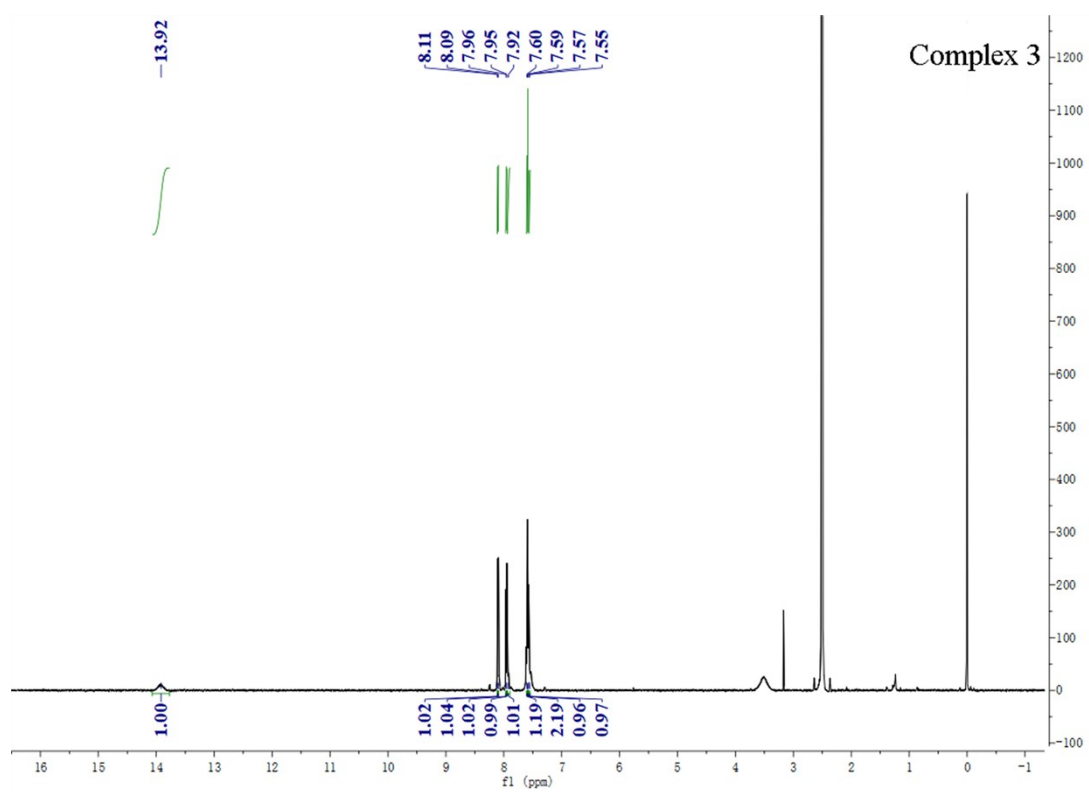

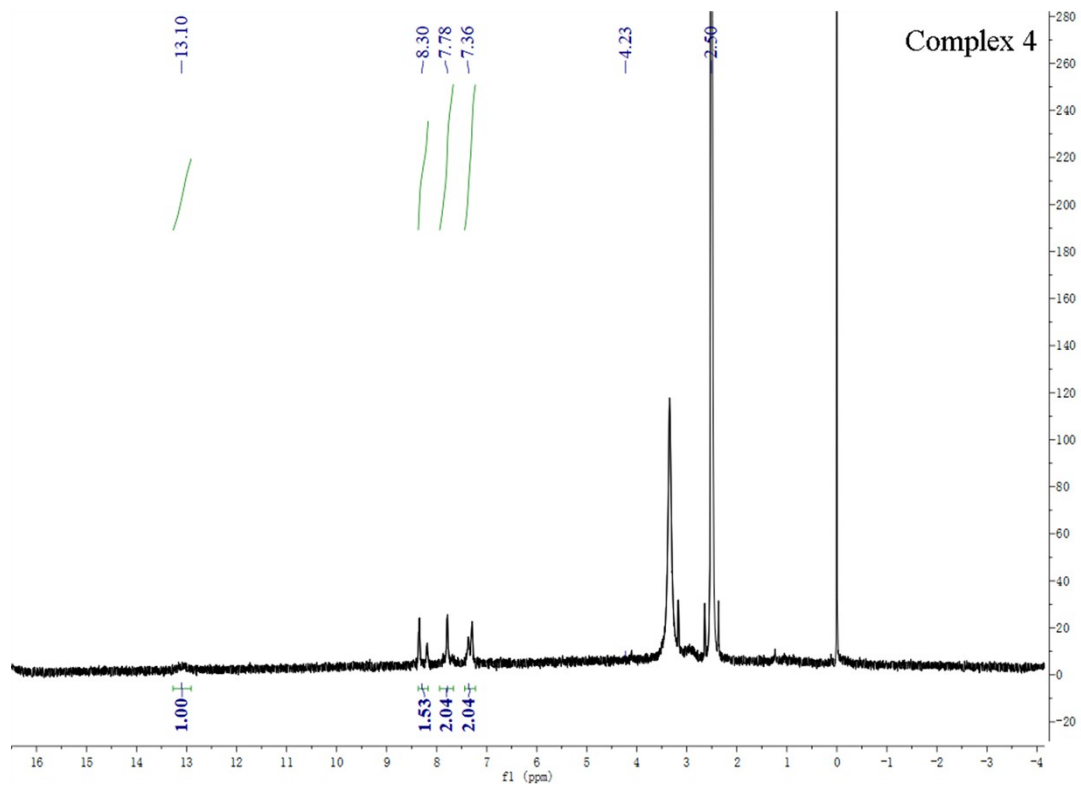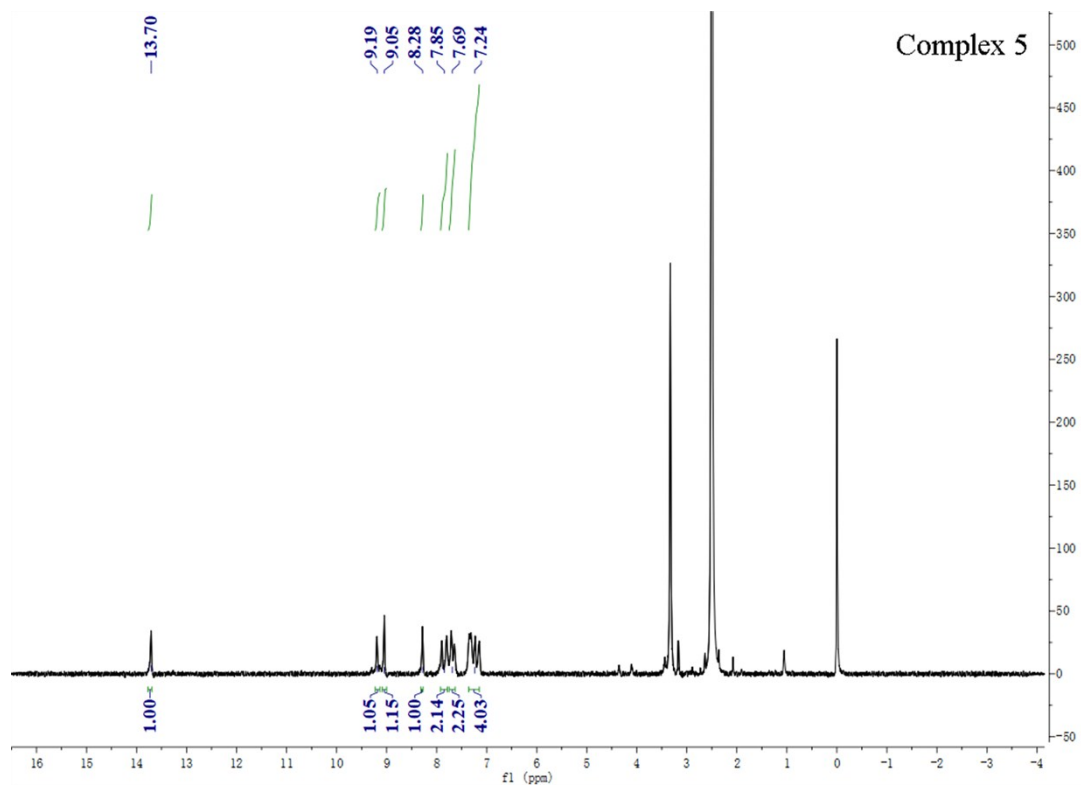

**Fig. S3**  $^1\text{H-NMR}$  spectra of complexes 1-5 in DMSO at 298 K.

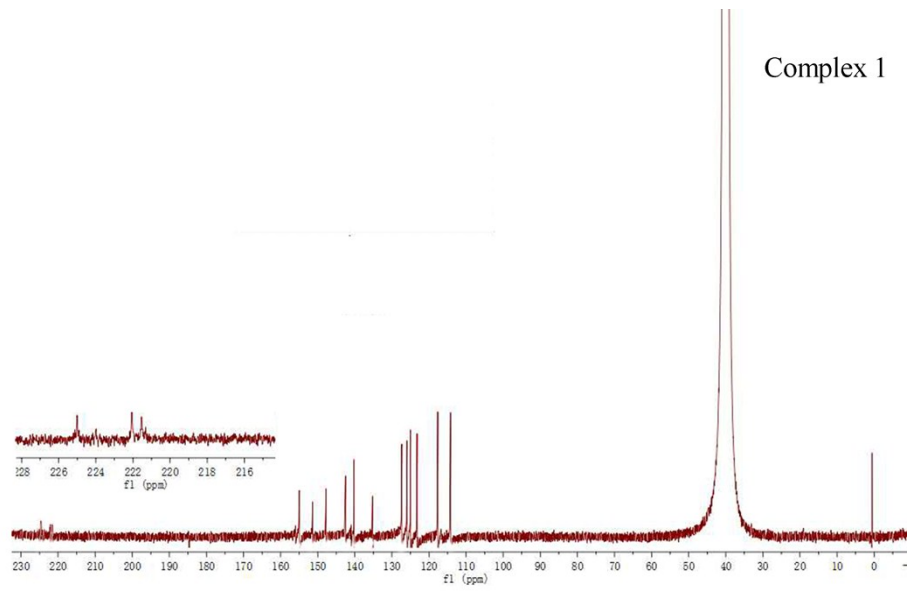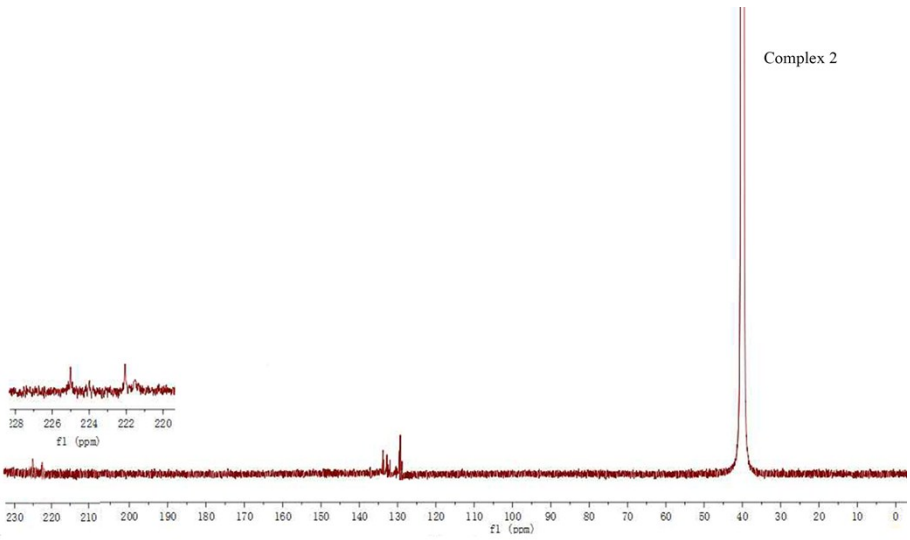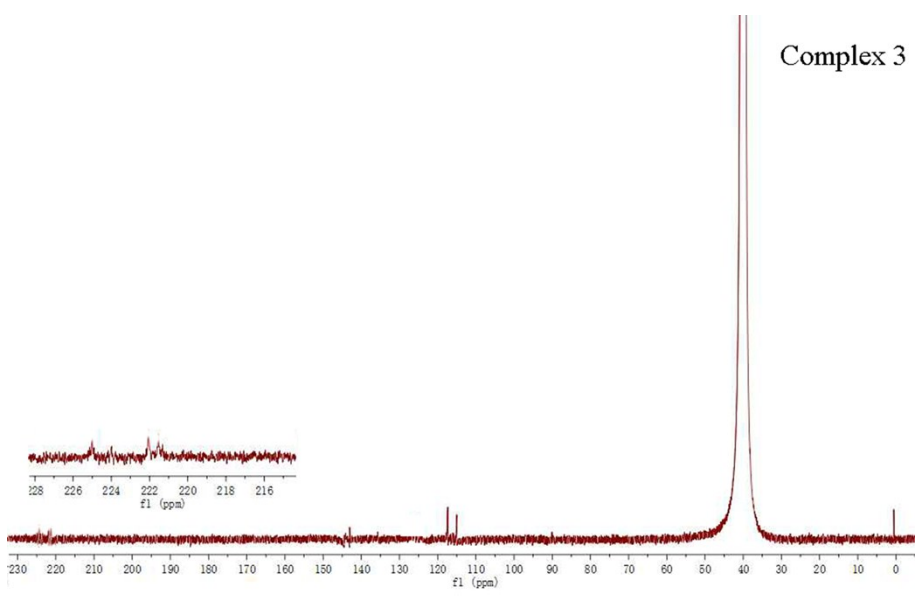

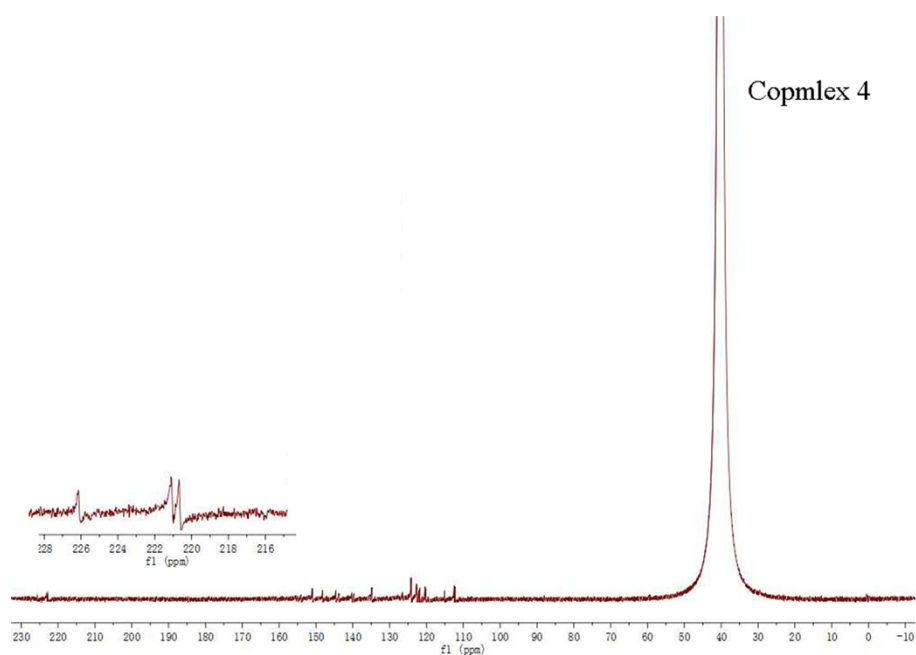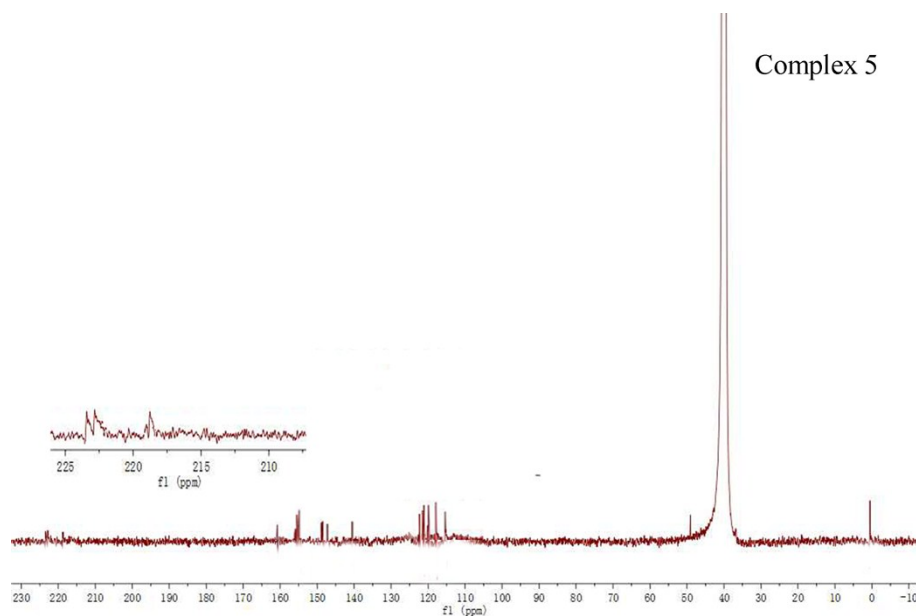

**Fig. S4**  $^{12}\text{C}$ -NMR spectra of complexes 1-5 in DMSO at 298 K.

Table S1. Crystal Data and Structure Refinement Parameters for complex 1-4

|                   | 1                                                        | 2                                                                     | 3                                                           | 4                                                           |
|-------------------|----------------------------------------------------------|-----------------------------------------------------------------------|-------------------------------------------------------------|-------------------------------------------------------------|
| Empirical formula | $\text{C}_{15}\text{H}_9\text{BrN}_3\text{O}_3\text{Mn}$ | $\text{C}_{50}\text{H}_{39}\text{ClN}_5\text{O}_6\text{P}_2\text{Mn}$ | $\text{C}_{17}\text{H}_{10}\text{BrN}_4\text{O}_3\text{Mn}$ | $\text{C}_{23}\text{H}_{17}\text{BrN}_5\text{O}_4\text{Mn}$ |
| Formula weight    | 414.10                                                   | 930.17                                                                | 453.13                                                      | 562.26                                                      |
| Colour            | Yellow                                                   | Pink                                                                  | Yellow                                                      | Yellow                                                      |
| Crystal system    | Triclinic                                                | Triclinic                                                             | Monoclinic                                                  | Monoclinic                                                  |
| Space group       | P-1                                                      | P-1                                                                   | $\text{P2}_1/\text{c}$                                      | $\text{P2}_1/\text{n}$                                      |
| $a$ (Å)           | 6.8422(3)                                                | 11.2347(7)                                                            | 7.091(2)                                                    | 7.2795(18)                                                  |
| $b$ (Å)           | 10.6873(5)                                               | 12.2555(7)                                                            | 18.276(6)                                                   | 15.523(4)                                                   |
| $c$ (Å)           | 11.6987(6)                                               | 16.4480(10)                                                           | 13.255(4)                                                   | 20.599(5)                                                   |
| $\alpha$ (deg)    | 91.775(3)                                                | 82.506(2)                                                             | 90.00                                                       | 90.00                                                       |

|                                            |                |                |                |                |
|--------------------------------------------|----------------|----------------|----------------|----------------|
| $\beta$ (deg)                              | 105.866(3)     | 88.492(3)      | 96.754(6)      | 98.920(17)     |
| $\gamma$ (deg)                             | 108.240(3)     | 77.515(2)      | 90.00          | 90.00          |
| $V$ (Å <sup>3</sup> )                      | 775.14(6)      | 2192.2(2)      | 1705.8(9)      | 2294.4(9)      |
| Z                                          | 2              | 2              | 16             | 4              |
| $\rho_{\text{calc}}$ (g·cm <sup>-3</sup> ) | 1.774          | 1.409          | 1.764          | 1.628          |
| Independent reflections                    | 3812           | 10902          | 3920           | 4042           |
| Goodness of fit ( $F^2$ ) <sup>a</sup>     | 1.041          | 1.036          | 0.930          | 0.980          |
| $R_1^b$ , $wR_2^c$ ( $I > 2\sigma(I)$ )    | 0.0440, 0.1092 | 0.0353, 0.0914 | 0.0480, 0.0849 | 0.0949, 0.1432 |
| $R_1$ , $wR_2$ (all data)                  | 0.0575, 0.1173 | 0.0470, 0.0996 | 0.1025, 0.1019 | 0.2403, 0.1998 |
| Largest diff. peak /hole/eÅ <sup>-3</sup>  | 1.93/-0.35     | 0.44/-0.32     | 1.06/-1.22     | 0.51/-0.58     |

<sup>a</sup>GOF =  $[\sum(\omega(F_o^2 - F_c^2)^2)/(N_o - N_v)]^{1/2}$  ( $N_o$ =number of observations,  $N_v$ = number of variables). <sup>b</sup> $R_1 = \sum |F_o| - |F_c| / \sum |F_o|$ . <sup>c</sup> $wR^2 = [(\sum \omega(|F_o|^2 - |F_c|^2)^2) / \sum \omega |F_o|^2]^{1/2}$ .

**Table S2.** Selected bond lengths (Å) and bond angles (°) of complexes **1-4**.

| 1                 |            | 2                 |             |
|-------------------|------------|-------------------|-------------|
| Mn(1)-Br(1)       | 2.5531(6)  | Mn(1)-C(17)       | 1.7775(16)  |
| Mn(1)-C(13)       | 1.808(4)   | Mn(1)-C(47)       | 1.7895(16)  |
| Mn(1)-C(14)       | 1.801(4)   | Mn(1)-N(2)        | 2.0530(12)  |
| Mn(1)-C(15)       | 1.790(4)   | Mn(1)-N(1)        | 2.0769(13)  |
| Mn(1)-N(1)        | 2.032(2)   | Mn(1)-P(1)        | 2.3287(4)   |
| Mn(1)-N(3)        | 2.093(3)   | Mn(1)-P(2)        | 2.3279(4)   |
| C(15)-Mn(1)-C(14) | 87.89(17)  | C(17)-Mn(1)-C(47) | 95.05(7)    |
| C(15)-Mn(1)-C(13) | 90.82(18)  | C(17)-Mn(1)-N(2)  | 170.40(6)   |
| C(14)-Mn(1)-C(13) | 88.83(18)  | C(47)-Mn(1)-N(2)  | 94.54(6)    |
| C(15)-Mn(1)-N(1)  | 172.32(15) | C(17)-Mn(1)-N(1)  | 92.18(6)    |
| C(14)-Mn(1)-N(1)  | 98.21(13)  | C(47)-Mn(1)-N(1)  | 172.65(6)   |
| C(13)-Mn(1)-N(1)  | 93.96(13)  | N(2)-Mn(1)-N(1)   | 78.24(5)    |
| C(15)-Mn(1)-N(3)  | 95.45(15)  | C(17)-Mn(1)-P(2)  | 88.92(5)    |
| C(14)-Mn(1)-N(3)  | 176.56(13) | C(47)-Mn(1)-P(2)  | 89.54(5)    |
| C(13)-Mn(1)-N(3)  | 91.94(14)  | N(2)-Mn(1)-P(2)   | 90.83(4)    |
| N(1)-Mn(1)-N(3)   | 78.39(10)  | N(1)-Mn(1)-P(2)   | 91.95(4)    |
| C(15)-Mn(1)-Br(1) | 88.00(15)  | C(17)-Mn(1)-P(1)  | 88.17(5)    |
| C(14)-Mn(1)-Br(1) | 89.90(14)  | C(47)-Mn(1)-P(1)  | 88.22(5)    |
| C(13)-Mn(1)-Br(1) | 178.30(12) | N(2)-Mn(1)-P(1)   | 92.45(4)    |
| N(1)-Mn(1)-Br(1)  | 87.35(8)   | N(1)-Mn(1)-P(1)   | 90.67(4)    |
| N(3)-Mn(1)-Br(1)  | 89.39(8)   | P(2)-Mn(1)-P(1)   | 176.158(16) |
| 3                 |            | 4                 |             |
| Mn(2)-Br(1)       | 2.5701(11) | Mn(2)-Br(1)       | 2.540(2)    |
| Mn(2)-C(15)       | 1.803(5)   | Mn(2)-C(12)       | 1.883(15)   |
| Mn(2)-C(16)       | 1.813(5)   | Mn(2)-C(22)       | 1.827(16)   |
| Mn(2)-C(17)       | 1.7996(6)  | Mn(2)-C(9)        | 1.806(12)   |
| Mn(2)-N(4)        | 2.066(3)   | Mn(2)-N(1)        | 2.051(10)   |

|                    |            |                   |           |
|--------------------|------------|-------------------|-----------|
| Mn(2)-N(1)         | 2.082(3)   | Mn(2)-N(8)        | 2.150(10) |
| C(15)-Mn(2)-Br(1)  | 87.33(16)  | C(22)-Mn(2)-C(9)  | 88.8(6)   |
| C(16)-Mn(2)- Br(1) | 90.12(16)  | C(22)-Mn(2)-C(12) | 86.2(6)   |
| C(16)-Mn(2)-C(15)  | 88.9(2)    | C(9)-Mn(2)-C(12)  | 90.2(5)   |
| C(17)-Mn(2)- Br(1) | 176.66(14) | C(22)-Mn(2)-N(1)  | 96.0(5)   |
| C(17)-Mn(2)- C(15) | 89.5(2)    | C(9)-Mn(2)-N(1)   | 97.4(4)   |
| C(17)-Mn(2)- C(16) | 88.7(2)    | C(12)-Mn(2)-N(1)  | 172.2(4)  |
| N(4)-Mn(2)-Br1     | 88.87(10)  | C(22)-Mn(2)-N(8)  | 174.1(4)  |
| N(4)-Mn(2)-C(15)   | 96.18(17)  | C(9)-Mn(2)-N(8)   | 94.6(5)   |
| N(4)-Mn(2)-C(16)   | 174.77(17) | C(12)-Mn(2)-N(8)  | 98.5(5)   |
| N(4)-Mn(2)-C(17)   | 92.62(18)  | N(1)-Mn(2)-N(8)   | 78.9(4)   |
| N(1)-Mn(2)-B1(1)   | 87.14(10)  | C(22)-Mn(2)-Br(1) | 86.1(4)   |
| N(1)-Mn(2)-C(15)   | 172.15(17) | C(9)-Mn(2)-Br(1)  | 173.1(4)  |
| N(1)-Mn(2)-C(16)   | 96.67(17)  | C(12)-Mn(2)-Br(1) | 84.7(3)   |
| N(1)-Mn(2)-C(17)   | 96.09(17)  | N(8)-Mn(2)-Br(1)  | 90.8(2)   |
| N(1)-Mn(2)-N(4)    | 78.15(12)  | N(1)-Mn(2)-Br(1)  | 87.9(2)   |

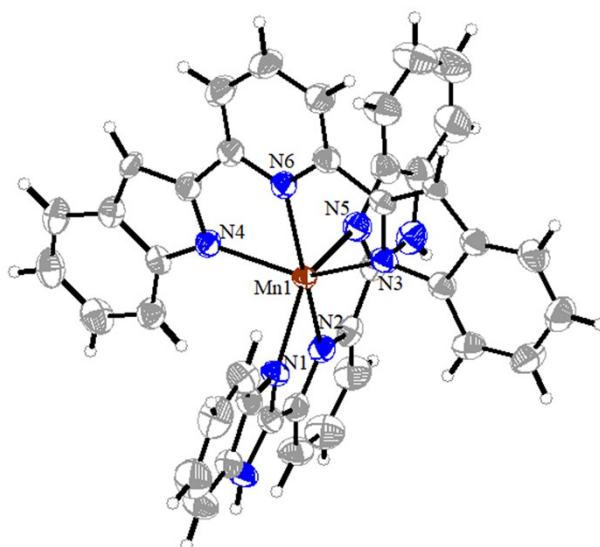

**Fig. S5** Molecular structure of complex composed of Mn and L3.

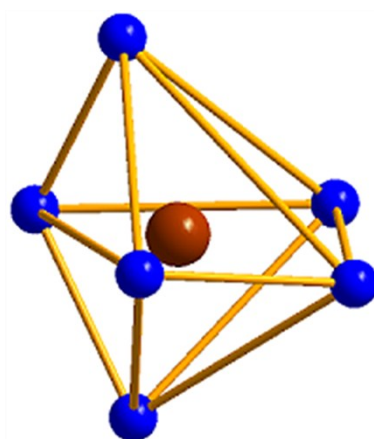



**Fig. S6** Coordination Arrangement of the complex composed of Mn and L3.

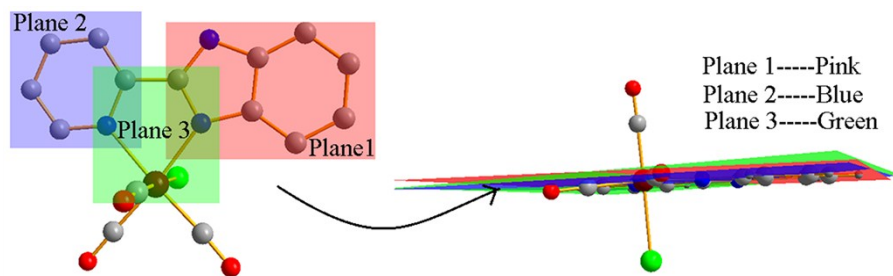

**Fig. S7** The dihedral angle of plane 1, 2 and 3 in complex 1.

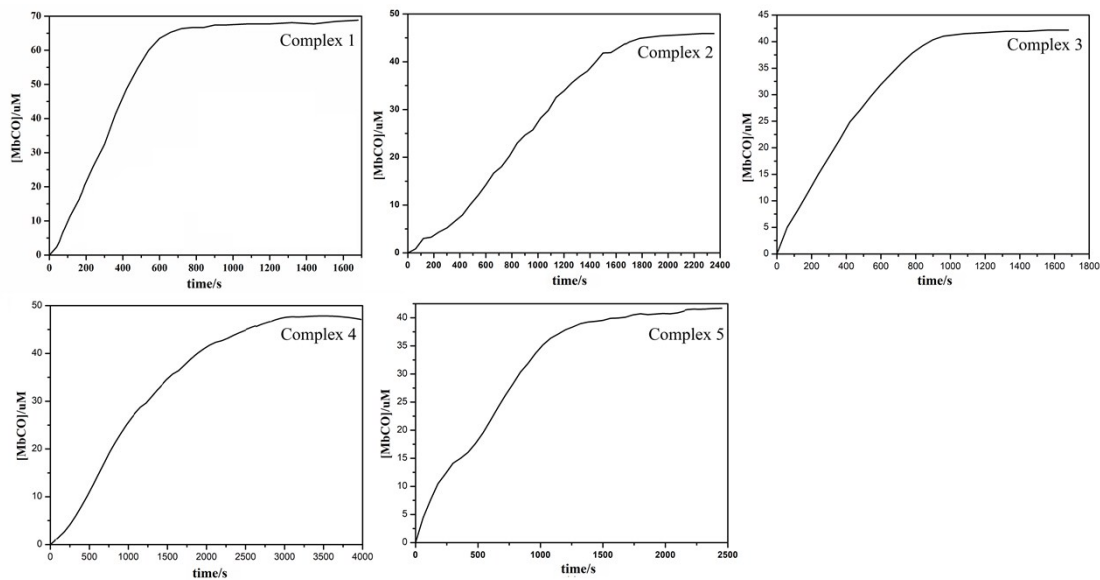

**Fig. S8** Amount of MbCO in  $\mu\text{M}$  formed with increasing irradiation time at 365 nm for a solution of complexes 1-5 (60  $\mu\text{M}$  in 0.1 PBS at pH 7.4) with sodium dithionite (10 mM) as determined from UV/vis spectroscopy.

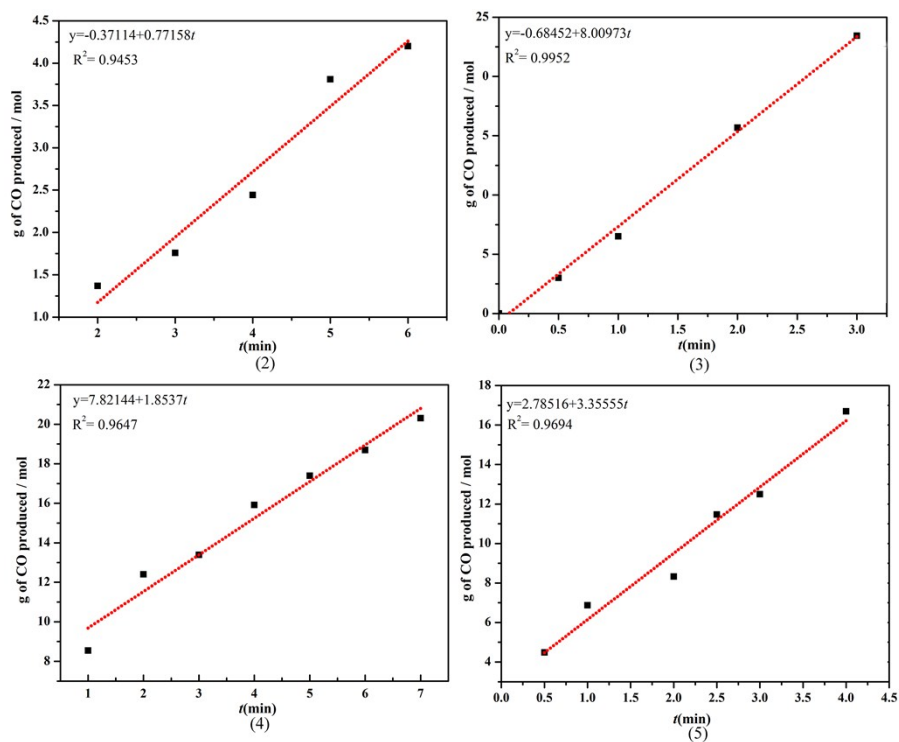

**Fig. S9** The rates of CO produced ( $k_{CO}$ ) for 2–5 by using a CO meter.

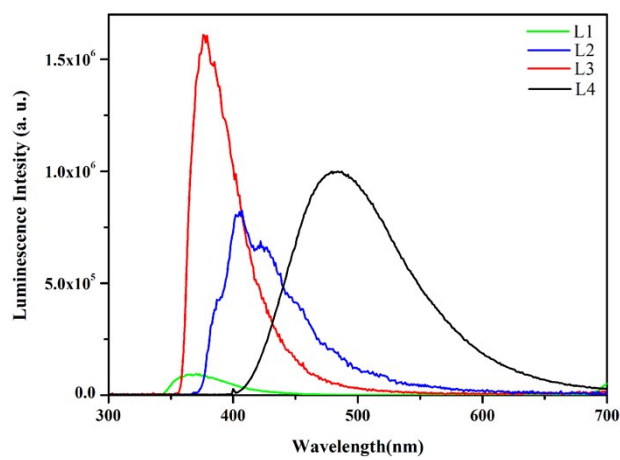

**Fig. S10** The emission spectra of L1-L4 in DMSO at room temperature.

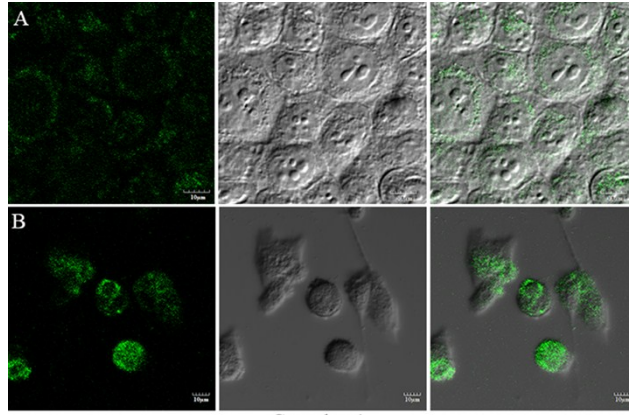

Complex 1

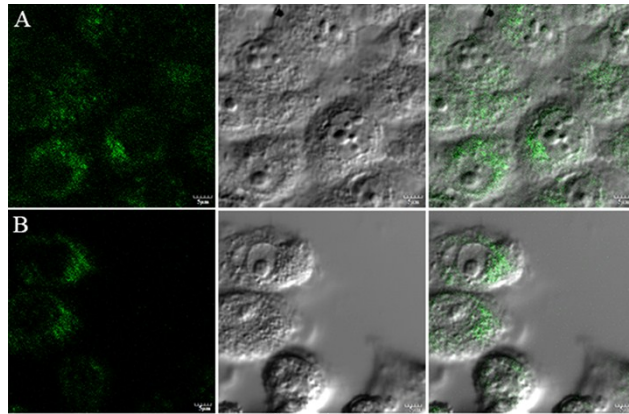

Complex 2

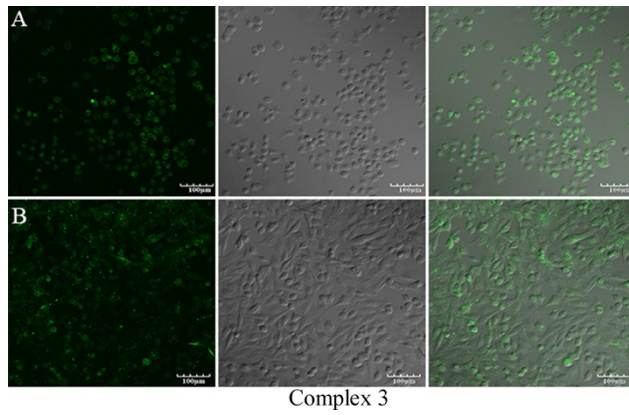

Complex 3

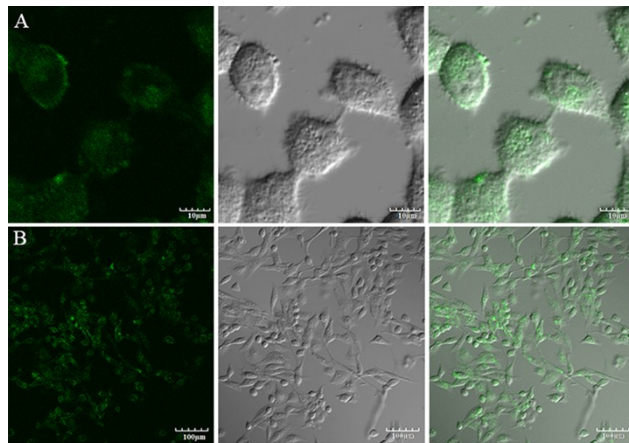

Complex 5

**Fig. S11** Fluorescence imaging of live HL-7702 cells (A) and SK-Hep1 cells (B) after being incubated with complex 1-3, 5 for 2 h. The left panels show dark-field fluorescence images, the middle panels show the corresponding bright-field images and the right panels are overlays of the left and middle panels.
